CORRECTION

## Correction: Success-efficient/failure-safe strategy for hierarchical reinforcement motor learning

The *PLOS Computational Biology* Staff

[S4 Fig](#) was uploaded incorrectly. Please see the correct [S4 Fig](#) here.

### Supporting information

**S4 Fig. Trials at which adaptation measures reached plateaus.** Trial numbers and standard deviations of when the Number of Failed Trials, Trajectory Area, Initial Trajectory Area, Co-Contraction, and Smoothness reached their respective plateaus. (PDF)

The publisher apologizes for the error.

### Reference

1. Babič J, Kunavar T, Oztop E, Kawato M. Success-efficient/failure-safe strategy for hierarchical reinforcement motor learning. *PLoS Comput Biol*. 2025;21(5):e1013089. <https://doi.org/10.1371/journal.pcbi.1013089> PMID: 40344154

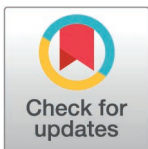

### OPEN ACCESS

**Citation:** The *PLOS Computational Biology* Staff (2025) Correction: Success-efficient/failure-safe strategy for hierarchical reinforcement motor learning. *PLoS Comput Biol* 21(9): e1013537. <https://doi.org/10.1371/journal.pcbi.1013537>

**Published:** September 30, 2025

**Copyright:** © 2025 The *PLOS Computational Biology* Staff. This is an open access article distributed under the terms of the [Creative Commons Attribution License](#), which permits unrestricted use, distribution, and reproduction in any medium, provided the original author and source are credited.
